# Supplementary material for: Baseline Susceptibility of Spodoptera frugiperda Populations Collected in India towards Different Chemical Classes of Insecticides
Source: MDPI journal article supplement (doi:10.3390/insects12080758), 2021-08-23
Supplement: s1 [file s1]

# Baseline susceptibility of *Spodoptera frugiperda* populations collected in India towards different chemical classes of insecticides

Mahesh Kulye <sup>1</sup>, Sonja Mehlhorn <sup>2</sup>, Debora Boaventura <sup>2</sup>, Nigel Godley <sup>2</sup>, Sreedevi K V <sup>1</sup>, Thimmaraju Rudrappa <sup>1</sup>, Tara Charan <sup>3</sup>, Dinesh Rath <sup>3</sup>, and Ralf Nauen <sup>2,\*</sup>

<sup>1</sup> Bayer AG, Crop Science Division, Bangalore, 560045, India; [mahesh.kulye@bayer.com](mailto:mahesh.kulye@bayer.com); [sreedevi.kv@bayer.com](mailto:sreedevi.kv@bayer.com); [thimmaraju.rudrappa@bayer.com](mailto:thimmaraju.rudrappa@bayer.com)

<sup>2</sup> Bayer AG, Crop Science Division, R&D, Alfred Nobel Str. 50, 40789 Monheim, Germany; [sonja.mehlhorn@bayer.com](mailto:sonja.mehlhorn@bayer.com); [debora.duarteboaventura@bayer.com](mailto:debora.duarteboaventura@bayer.com); [nigel.godley@bayer.com](mailto:nigel.godley@bayer.com); [ralf.nauen@bayer.com](mailto:ralf.nauen@bayer.com)

<sup>3</sup> Bayer AG, CoWrks India Private, New Delhi, 110037, India; [tara.chan@bayer.com](mailto:tara.chan@bayer.com); [dinesh.rathi@bayer.com](mailto:dinesh.rathi@bayer.com)

\* Correspondence: [ralf.nauen@bayer.com](mailto:ralf.nauen@bayer.com)

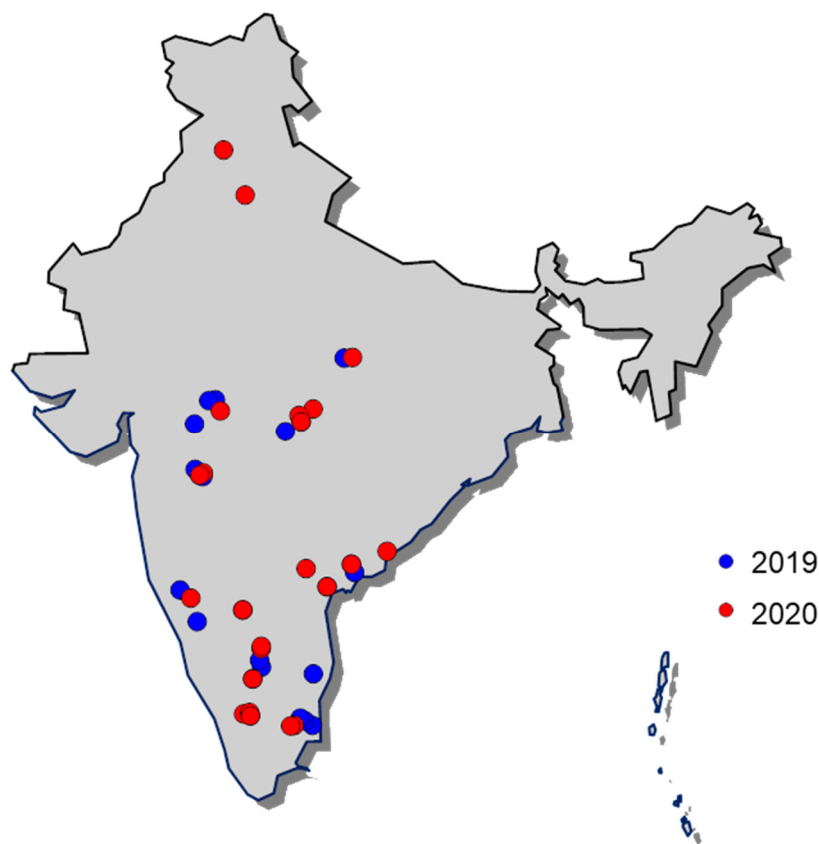

**Figure S1.** Schematic map of *Spodoptera frugiperda* collection sites across India in 2019 (blue) and 2020 (red). The schematic map was created using EasyMap software (Lutum+Tappert DV-Beratung GmbH, Bonn, Germany).

**Table S1.** Details on *Spodoptera frugiperda* sampling sites and years

| Region  | Sample ID | State          | District        | City             | Year |
|---------|-----------|----------------|-----------------|------------------|------|
| South   | SUS-I     | Karnataka      | Bangalore Rural | Doddaballapura   | 2018 |
| Central | MP-BB     | Madhya Pradesh | Barwani         | Badgaon          | 2019 |
| Central | MP-CC     | Madhya Pradesh | Chhindwara      | Chand            | 2019 |
| Central | MP-CCD    | Madhya Pradesh | Chhindwara      | Chhindwara       | 2019 |
| Central | MP-IA     | Madhya Pradesh | Indore          | Aurangapura      | 2019 |
| Central | MP-ID     | Madhya Pradesh | Indore          | Dhannad          | 2019 |
| Central | MP-SM     | Madhya Pradesh | Satna           | Maihar           | 2019 |
| West    | MH-AG     | Maharashtra    | Aurangabad      | Ganori           | 2019 |
| West    | MH-AH     | Maharashtra    | Aurangabad      | Hatnur           | 2019 |
| West    | MH-AK     | Maharashtra    | Aurangabad      | Khultabad        | 2019 |
| South   | AP-KG     | Andhra Pradesh | Krishna         | Gannavaram       | 2019 |
| South   | AP-PB     | Andhra Pradesh | Prakasam        | Bobbepalli       | 2019 |
| South   | AP-WV     | Andhra Pradesh | West Godhavari  | Vijayara         | 2019 |
| South   | KA-BA     | Karnataka      | Bangalore Rural | Aralu mallige    | 2019 |
| South   | KA-BS     | Karnataka      | Bangalore Rural | Shampur          | 2019 |
| South   | KA-BI     | Karnataka      | Bellary         | Ibrahimpura      | 2019 |
| South   | KA-BN     | Karnataka      | Belgaum         | Narendra Nagar   | 2019 |
| South   | KA-HA     | Karnataka      | Haveri          | Akkialur         | 2019 |
| South   | KA-RH     | Karnataka      | Ramanagara      | Haniyur          | 2019 |
| South   | TN-AR     | Tamil Nadu     | Ariyalur        | Reddipalayam     | 2019 |
| South   | TN-AS1    | Tamil Nadu     | Ariyalur        | Sripuranthan     | 2019 |
| South   | TN-AS2    | Tamil Nadu     | Ariyalur        | Sripuranthan     | 2019 |
| South   | TN-CD     | Tamil Nadu     | Coimbatore      | Dasapalayam      | 2019 |
| South   | TN-TA     | Tamil Nadu     | Tiruvavur       | Allikulam        | 2019 |
| South   | TN-TP     | Tamil Nadu     | Tiruvannamalai  | Pudupalayam      | 2019 |
| North   | PB-HS     | Punjab         | Hoshiapur       | Simbli           | 2020 |
| North   | HR-KS     | Haryana        | Karnal          | Sohana           | 2020 |
| Central | MP-CC     | Madhya Pradesh | Chhindwara      | Chand            | 2020 |
| Central | MP-CJ     | Madhya Pradesh | Chhindwara      | Jhirlinga        | 2020 |
| Central | MP-KB     | Madhya Pradesh | Khargone        | Barwaha          | 2020 |
| Central | MP-SK     | Madhya Pradesh | Satna           | Kandwari         | 2020 |
| Central | MP-ST     | Madhya Pradesh | Seoni           | Thaori           | 2020 |
| West    | MH-AK     | Maharashtra    | Aurangabad      | Kultabad         | 2020 |
| West    | MH-AP     | Maharashtra    | Aurangabad      | Phulmbri         | 2020 |
| South   | AP-AD     | Andhra Pradesh | Anantapur       | Demakethapalli   | 2020 |
| South   | AP-ET     | Andhra Pradesh | East Godhavari  | Thimmapuram      | 2020 |
| South   | AP-WV     | Andhra Pradesh | West Godhavari  | Vijayara         | 2020 |
| South   | AP-PB     | Andhra Pradesh | Prakasam        | Bobbepalli       | 2020 |
| South   | KA-BI     | Karnataka      | Bellary         | Ibrahimpura      | 2020 |
| South   | KA-DG     | Karnataka      | Dharwad         | Garag            | 2020 |
| South   | KA-KV     | Karnataka      | Kolar           | Vatadahosahalli  | 2020 |
| South   | KA-RH     | Karnataka      | Ramanagara      | Haniyur          | 2020 |
| South   | TG-NV     | Telangana      | Nalgonda        | Vijayapuri North | 2020 |
| South   | TN-CA     | Tamil Nadu     | Coimbatore      | Allapalayam      | 2020 |
| South   | TN-CM     | Tamil Nadu     | Coimbatore      | Meenampalayam    | 2020 |
| South   | TN-ES     | Tamil Nadu     | Erode           | Salai palayam    | 2020 |
| South   | TN-TT     | Tamil Nadu     | Tiruchirappalli | Athigudi         | 2020 |
| South   | TN-TV     | Tamil Nadu     | Tiruchirappalli | Varakuppai       | 2020 |

**Table S2.** Log-dose mortality data for thiodicarb against third instar larvae of Indian populations of *Spodoptera frugiperda* in diet incorporation assays based on IRAC method no. 20. Mortality was assessed five days after treatment.

| Sample ID | Year | EC <sub>50</sub><br>[µg/mL] | 95% CI <sup>1</sup> | Slope (±SE <sup>2</sup> ) | RR <sup>3</sup> to<br>SUS-2005 | RR <sup>3</sup> to I-<br>2018 | EC <sub>95</sub><br>[µg/mL] | 95% CI <sup>1</sup> |
|-----------|------|-----------------------------|---------------------|---------------------------|--------------------------------|-------------------------------|-----------------------------|---------------------|
| SUS-2005  | 2005 | 3.566                       | 3.424 - 3.715       | 5.16 (0.43)               | 1.00                           | 0.51                          | 6.312                       | 5.668 - 7.030       |
| I-2018    | 2018 | 7.007                       | 6.540 - 7.508       | 2.04 (0.13)               | 1.96                           | 1.00                          | 29.580                      | 24.140 - 36.250     |
| MP-CC     | 2019 | 4.473                       | 4.132 - 4.841       | 1.90 (0.13)               | 1.25                           | 0.64                          | 21.040                      | 16.580 - 26.700     |
| MP-SM     | 2019 | 6.437                       | 6.043 - 6.858       | 1.53 (0.07)               | 1.81                           | 0.92                          | 44.350                      | 35.980 - 54.660     |
| MH-AG     | 2019 | 2.912                       | 2.579 - 3.288       | 1.68 (0.17)               | 0.82                           | 0.42                          | 16.860                      | 11.400 - 24.940     |
| AP-KG     | 2019 | 4.488                       | 4.159 - 4.843       | 1.95 (0.13)               | 1.26                           | 0.64                          | 20.380                      | 16.230 - 25.580     |
| KA-BA     | 2019 | 13.280                      | 12.470 - 14.150     | 1.82 (0.10)               | 3.72                           | 1.90                          | 66.840                      | 54.490 - 81.980     |
| KA-HA     | 2019 | 4.460                       | 4.194 - 4.743       | 2.11 (0.13)               | 1.25                           | 0.64                          | 17.960                      | 14.860 - 21.720     |
| TN-TA     | 2019 | 16.020                      | 14.620 - 17.550     | 1.32 (0.09)               | 4.49                           | 2.29                          | 147.900                     | 103.900 - 210.800   |
| PB-HS     | 2020 | 5.375                       | 5.089 - 5.676       | 2.45 (0.14)               | 1.51                           | 0.77                          | 17.850                      | 15.260 - 20.880     |
| HR-KS     | 2020 | 10.100                      | 9.512 - 10.710      | 2.22 (0.13)               | 2.83                           | 1.44                          | 38.080                      | 31.870 - 45.490     |
| MP-CC     | 2020 | 4.285                       | 3.998 - 4.593       | 2.33 (0.17)               | 1.20                           | 0.61                          | 15.130                      | 12.400 - 18.470     |
| MP-CJ     | 2020 | 5.332                       | 4.907 - 5.792       | 2.11 (0.17)               | 1.50                           | 0.76                          | 21.570                      | 16.860 - 27.590     |
| MP-KB     | 2020 | 5.491                       | 5.192 - 5.806       | 2.54 (0.16)               | 1.54                           | 0.78                          | 17.490                      | 14.930 - 20.490     |
| MP-SK     | 2020 | 6.260                       | 5.948 - 6.588       | 2.23 (0.11)               | 1.76                           | 0.89                          | 23.450                      | 20.220 - 27.210     |
| MP-ST     | 2020 | 8.154                       | 7.563 - 8.792       | 1.97 (0.13)               | 2.29                           | 1.16                          | 36.390                      | 29.030 - 45.610     |
| MH-AK     | 2020 | 6.172                       | 5.953 - 6.399       | 2.63 (0.11)               | 1.73                           | 0.88                          | 18.890                      | 17.060 - 20.920     |
| MH-AP     | 2020 | 8.289                       | 7.888 - 8.710       | 2.60 (0.14)               | 2.32                           | 1.18                          | 25.740                      | 22.370 - 29.620     |
| AP-AD     | 2020 | 9.329                       | 8.744 - 9.953       | 2.53 (0.18)               | 2.62                           | 1.33                          | 29.840                      | 24.830 - 35.880     |
| AP-ET     | 2020 | 5.493                       | 4.950 - 6.096       | 1.74 (0.15)               | 1.54                           | 0.78                          | 29.720                      | 21.360 - 41.370     |
| AP-WV     | 2020 | 6.982                       | 6.629 - 7.354       | 2.53 (0.14)               | 1.96                           | 1.00                          | 22.350                      | 19.270 - 25.930     |
| AP-PB     | 2020 | 9.061                       | 8.785 - 9.345       | 2.63 (0.09)               | 2.54                           | 1.29                          | 27.780                      | 25.450 - 30.330     |
| KA-BI     | 2020 | 8.101                       | 7.649 - 8.580       | 2.10 (0.11)               | 2.27                           | 1.16                          | 32.940                      | 27.850 - 38.970     |
| KA-DG     | 2020 | 5.141                       | 4.867 - 5.430       | 2.15 (0.11)               | 1.44                           | 0.73                          | 20.250                      | 17.260 - 23.740     |
| KA-KV     | 2020 | 7.993                       | 7.498 - 8.521       | 2.50 (0.17)               | 2.24                           | 1.14                          | 25.910                      | 21.610 - 31.080     |
| KA-RH     | 2020 | 10.260                      | 9.564 - 11.010      | 1.73 (0.10)               | 2.88                           | 1.46                          | 56.210                      | 45.020 - 70.180     |
| TG-NV     | 2020 | 11.290                      | 10.67 - 11.950      | 2.53 (0.16)               | 3.17                           | 1.61                          | 36.170                      | 30.720 - 42.580     |
| TN-CA     | 2020 | 7.213                       | 6.633 - 7.843       | 1.82 (0.13)               | 2.02                           | 1.03                          | 36.400                      | 28.200 - 46.980     |
| TN-CM     | 2020 | 11.760                      | 11.000 - 12.560     | 1.41 (0.07)               | 3.30                           | 1.68                          | 95.220                      | 74.760 - 121.300    |
| TN-ES     | 2020 | 7.424                       | 6.958 - 7.921       | 2.07 (0.12)               | 2.08                           | 1.06                          | 30.850                      | 25.490 - 37.330     |
| TN-TT     | 2020 | 6.784                       | 6.320 - 7.282       | 1.92 (0.12)               | 1.90                           | 0.97                          | 31.550                      | 25.530 - 39.000     |
| TN-TV     | 2020 | 7.606                       | 7.193 - 8.043       | 2.11 (0.11)               | 2.13                           | 1.09                          | 30.790                      | 26.130 - 36.270     |

<sup>1</sup>CI: confidence interval; <sup>2</sup>SE: standard error; <sup>3</sup>RR: resistance ratio, EC<sub>50</sub> values of respective population divided by EC<sub>50</sub> of population SUS-2005 or I-2018

**Table S3.** Log-dose mortality data for chlorpyrifos against third instar larvae of Indian populations of *Spodoptera frugiperda* in diet incorporation assays based on IRAC method no. 20. Mortality was assessed five days after treatment.

| Sample ID | Year | EC <sub>50</sub><br>[µg/mL] | 95% CI <sup>1</sup> | Slope (±SE <sup>2</sup> ) | RR <sup>3</sup> to<br>SUS-2005 | RR <sup>3</sup> to I-<br>2018 | EC <sub>95</sub><br>[µg/mL] | 95% CI <sup>1</sup> |
|-----------|------|-----------------------------|---------------------|---------------------------|--------------------------------|-------------------------------|-----------------------------|---------------------|
| SUS-2005  | 2005 | 1.783                       | 1.693 - 1.879       | 6.72 (0.95)               | 1.00                           | 0.24                          | 2.763                       | 2.419 - 3.157       |
| I-2018    | 2018 | 7.509                       | 7.119 - 7.921       | 2.31 (0.12)               | 4.21                           | 1.00                          | 26.870                      | 23.040 - 31.330     |
| MP-CC     | 2019 | 6.341                       | 5.773 - 6.965       | 2.07 (0.19)               | 3.56                           | 0.84                          | 26.250                      | 19.680 - 35.000     |
| MP-SM     | 2019 | 5.866                       | 5.438 - 6.328       | 1.94 (0.13)               | 3.29                           | 0.78                          | 26.710                      | 21.300 - 33.500     |
| MH-AG     | 2019 | 4.025                       | 3.763 - 4.306       | 2.34 (0.16)               | 2.26                           | 0.54                          | 14.210                      | 11.710 - 17.240     |
| AP-KG     | 2019 | 5.534                       | 5.173 - 5.919       | 2.02 (0.12)               | 3.10                           | 0.74                          | 23.790                      | 19.470 - 29.050     |
| KA-BA     | 2019 | 6.162                       | 5.759 - 6.593       | 2.43 (0.18)               | 3.46                           | 0.82                          | 20.680                      | 16.960 - 25.200     |
| KA-HA     | 2019 | 3.964                       | 3.628 - 4.331       | 2.15 (0.18)               | 2.22                           | 0.53                          | 15.560                      | 12.020 - 20.130     |
| TN-TA     | 2019 | 8.207                       | 7.701 - 8.746       | 2.49 (0.18)               | 4.60                           | 1.09                          | 26.820                      | 22.200 - 32.390     |
| PB-HS     | 2020 | 3.620                       | 3.410 - 3.843       | 1.81 (0.09)               | 2.03                           | 0.48                          | 18.460                      | 15.310 - 22.250     |
| HR-KS     | 2020 | 21.700                      | 20.510 - 22.950     | 2.13 (0.11)               | 12.17                          | 2.89                          | 86.290                      | 73.280 - 101.600    |
| MP-CC     | 2020 | 6.730                       | 6.314 - 7.174       | 2.02 (0.12)               | 3.77                           | 0.90                          | 28.890                      | 23.920 - 34.900     |
| MP-CJ     | 2020 | 8.024                       | 7.427 - 8.670       | 1.88 (0.13)               | 4.50                           | 1.07                          | 38.560                      | 30.470 - 48.780     |
| MP-KB     | 2020 | 9.223                       | 8.621 - 9.866       | 2.02 (0.12)               | 5.17                           | 1.23                          | 39.660                      | 32.470 - 48.450     |
| MP-SK     | 2020 | 6.077                       | 5.775 - 6.394       | 2.22 (0.11)               | 3.41                           | 0.81                          | 22.850                      | 19.710 - 26.480     |
| MP-ST     | 2020 | 4.731                       | 4.382 - 5.107       | 1.93 (0.13)               | 2.65                           | 0.63                          | 21.820                      | 17.320 - 27.490     |
| MH-AK     | 2020 | 7.724                       | 7.099 - 8.404       | 2.05 (0.16)               | 4.33                           | 1.03                          | 32.560                      | 25.370 - 41.790     |
| MH-AP     | 2020 | 4.323                       | 4.040 - 4.625       | 2.04 (0.13)               | 2.42                           | 0.58                          | 18.310                      | 15.000 - 22.350     |
| AP-AD     | 2020 | 6.021                       | 5.656 - 6.411       | 2.01 (0.11)               | 3.38                           | 0.80                          | 26.120                      | 21.660 - 31.510     |
| AP-ET     | 2020 | 4.601                       | 4.373 - 4.840       | 2.21 (0.11)               | 2.58                           | 0.61                          | 17.410                      | 15.040 - 20.160     |
| AP-WV     | 2020 | 6.831                       | 6.421 - 7.268       | 2.18 (0.13)               | 3.83                           | 0.91                          | 26.370                      | 21.930 - 31.710     |
| AP-PB     | 2020 | 49.100                      | 45.880 - 52.560     | 2.90 (0.25)               | 27.54                          | 6.54                          | 135.500                     | 111.100 - 165.200   |
| KA-BI     | 2020 | 5.144                       | 4.619 - 5.728       | 2.24 (0.19)               | 2.89                           | 0.69                          | 19.190                      | 15.880 - 23.190     |
| KA-DG     | 2020 | 7.249                       | 6.827 - 7.698       | 2.26 (0.14)               | 4.07                           | 0.97                          | 26.710                      | 22.400 - 31.850     |
| KA-KV     | 2020 | 7.418                       | 7.046 - 7.810       | 1.88 (0.09)               | 4.16                           | 0.99                          | 35.570                      | 30.030 - 42.140     |
| KA-RH     | 2020 | 12.790                      | 11.920 - 13.730     | 2.14 (0.15)               | 7.17                           | 1.70                          | 50.560                      | 41.060 - 62.260     |
| TG-NV     | 2020 | 5.411                       | 5.030 - 5.820       | 2.25 (0.16)               | 3.03                           | 0.72                          | 20.020                      | 16.170 - 24.780     |
| TN-CA     | 2020 | 3.812                       | 3.593 - 4.045       | 1.71 (0.08)               | 2.14                           | 0.51                          | 21.310                      | 17.600 - 25.790     |
| TN-CM     | 2020 | 5.701                       | 5.265 - 6.172       | 1.95 (0.14)               | 3.20                           | 0.76                          | 25.720                      | 20.260 - 32.640     |
| TN-ES     | 2020 | 6.115                       | 5.718 - 6.541       | 1.93 (0.11)               | 3.43                           | 0.81                          | 28.210                      | 23.010 - 34.600     |
| TN-TT     | 2020 | 8.036                       | 7.655 - 8.436       | 1.70 (0.07)               | 4.51                           | 1.07                          | 45.430                      | 38.640 - 53.420     |
| TN-TV     | 2020 | 8.493                       | 7.876 - 9.159       | 2.00 (0.14)               | 4.76                           | 1.13                          | 37.150                      | 29.620 - 46.600     |

<sup>1</sup>CI: confidence interval; <sup>2</sup>SE: standard error; <sup>3</sup>RR: resistance ratio, EC<sub>50</sub> values of respective population divided by EC<sub>50</sub> of population SUS-2005 or I-2018

**Table S4.** Log-dose mortality data for fipronil against third instar larvae of Indian populations of *Spodoptera frugiperda* in diet incorporation assays based on IRAC method no. 20. Mortality was assessed five days after treatment.

| Sample ID | Year | EC <sub>50</sub><br>[µg/mL] | 95% CI <sup>1</sup> | Slope (±SE <sup>2</sup> ) | RR <sup>3</sup> to<br>SUS-2005 | RR <sup>3</sup> to I-<br>2018 | EC <sub>95</sub><br>[µg/mL] | 95% CI <sup>1</sup> |
|-----------|------|-----------------------------|---------------------|---------------------------|--------------------------------|-------------------------------|-----------------------------|---------------------|
| SUS-2005  | 2005 | 6.549                       | 6.169 - 6.952       | 4.91 (0.64)               | 1.00                           | 1.44                          | 11.930                      | 10.030 - 14.180     |
| I-2018    | 2018 | 4.558                       | 4.358 - 4.767       | 2.61 (0.13)               | 0.70                           | 1.00                          | 14.110                      | 12.430 - 16.020     |
| MP-BB     | 2019 | 7.919                       | 7.485 - 8.378       | 2.27 (0.13)               | 1.21                           | 1.74                          | 29.050                      | 24.690 - 34.170     |
| MP-CC     | 2019 | 10.450                      | 9.489 - 11.510      | 1.62 (0.13)               | 1.60                           | 2.29                          | 64.560                      | 45.940 - 90.710     |
| MP-CCD    | 2019 | 5.768                       | 5.421 - 6.138       | 1.94 (0.11)               | 0.88                           | 1.27                          | 26.340                      | 21.880 - 31.700     |
| MP-IA     | 2019 | 3.774                       | 3.547 - 4.014       | 2.24 (0.14)               | 0.58                           | 0.83                          | 14.070                      | 11.760 - 16.840     |
| MP-ID     | 2019 | 5.788                       | 5.541 - 6.046       | 2.37 (0.11)               | 0.88                           | 1.27                          | 20.040                      | 17.690 - 22.700     |
| MP-SM     | 2019 | 15.820                      | 14.560 - 17.190     | 1.84 (0.14)               | 2.42                           | 3.47                          | 78.590                      | 59.430 - 103.900    |
| MH-AG     | 2019 | 8.875                       | 8.538 - 9.225       | 3.06 (0.15)               | 1.36                           | 1.95                          | 23.260                      | 20.880 - 25.930     |
| MH-AH     | 2019 | 6.322                       | 5.852 - 6.830       | 1.86 (0.13)               | 0.97                           | 1.39                          | 30.700                      | 24.020 - 39.240     |
| MH-AK     | 2019 | 8.803                       | 8.245 - 9.399       | 1.62 (0.09)               | 1.34                           | 1.93                          | 54.440                      | 43.600 - 67.980     |
| AP-KG     | 2019 | 8.995                       | 8.447 - 9.579       | 2.54 (0.17)               | 1.37                           | 1.97                          | 28.680                      | 23.990 - 34.280     |
| AP-PB     | 2019 | 5.997                       | 5.642 - 6.375       | 2.13 (0.12)               | 0.92                           | 1.32                          | 23.860                      | 19.960 - 28.520     |
| AP-WV     | 2019 | 5.735                       | 5.193 - 6.332       | 1.72 (0.14)               | 0.88                           | 1.26                          | 31.910                      | 23.450 - 43.430     |
| KA-BA     | 2019 | 9.073                       | 7.956 - 10.350      | 1.75 (0.19)               | 1.39                           | 1.99                          | 48.790                      | 32.420 - 73.420     |
| KA-BS     | 2019 | 4.502                       | 3.865 - 5.245       | 1.3 (0.12)                | 0.69                           | 0.99                          | 43.630                      | 27.560 - 69.070     |
| KA-BI     | 2019 | 9.549                       | 8.921 - 10.220      | 2.39 (0.17)               | 1.46                           | 2.09                          | 32.810                      | 26.990 - 39.890     |
| KA-BN     | 2019 | 10.160                      | 9.554 - 10.810      | 1.64 (0.08)               | 1.55                           | 2.23                          | 61.060                      | 50.080 - 74.450     |
| KA-HA     | 2019 | 14.590                      | 13.280 - 16.040     | 1.71 (0.14)               | 2.23                           | 3.20                          | 81.410                      | 59.100 - 112.100    |
| KA-RH     | 2019 | 4.645                       | 4.147 - 5.204       | 1.56 (0.12)               | 0.71                           | 1.02                          | 30.510                      | 21.960 - 42.390     |
| TN-AR     | 2019 | 5.560                       | 5.171 - 5.978       | 2.16 (0.15)               | 0.85                           | 1.22                          | 21.770                      | 17.560 - 27.000     |
| TN-AS1    | 2019 | 9.909                       | 9.392 - 10.450      | 2.21 (0.12)               | 1.51                           | 2.17                          | 37.590                      | 32.150 - 43.960     |
| TN-AS2    | 2019 | 4.516                       | 4.197 - 4.859       | 2.16 (0.15)               | 0.69                           | 0.99                          | 17.660                      | 14.260 - 21.860     |
| TN-CD     | 2019 | 7.837                       | 7.212 - 8.518       | 2.02 (0.16)               | 1.20                           | 1.72                          | 33.580                      | 26.050 - 43.270     |
| TN-TA     | 2019 | 7.853                       | 7.198 - 8.568       | 1.7 (0.12)                | 1.20                           | 1.72                          | 44.460                      | 33.810 - 58.480     |
| TN-TP     | 2019 | 6.923                       | 6.601 - 7.262       | 2.12 (0.1)                | 1.06                           | 1.52                          | 27.790                      | 24.130 - 32.000     |

<sup>1</sup>CI: confidence interval; <sup>2</sup>SE: standard error; <sup>3</sup>RR: resistance ratio, EC<sub>50</sub> values of respective population divided by EC<sub>50</sub> of population SUS-2005 or I-2018

**Table S5.** Log-dose mortality data for deltamethrin against third instar larvae of Indian populations of *Spodoptera frugiperda* in diet incorporation assays based on IRAC method no. 20. Mortality was assessed five days after treatment.

| Sample ID | Year | EC <sub>50</sub><br>[µg/mL] | 95% CI <sup>1</sup> | Slope (±SE <sup>2</sup> ) | RR <sup>3</sup> to<br>SUS-2005 | RR <sup>3</sup> to I-<br>2018 | EC <sub>95</sub><br>[µg/mL] | 95% CI <sup>1</sup> |
|-----------|------|-----------------------------|---------------------|---------------------------|--------------------------------|-------------------------------|-----------------------------|---------------------|
| SUS-2005  | 2005 | 0.198                       | 0.190 - 0.206       | 2.94 (0.16)               | 1.00                           | 0.05                          | 0.538                       | 0.481 - 0.602       |
| I-2018    | 2018 | 4.271                       | 3.946 - 4.623       | 2.12 (0.16)               | 21.61                          | 1.00                          | 17.080                      | 13.420 - 21.750     |
| MP-CC     | 2019 | 3.177                       | 2.934 - 3.441       | 2.22 (0.18)               | 16.08                          | 0.74                          | 11.950                      | 9.424 - 15.140      |
| MP-SM     | 2019 | 4.802                       | 4.437 - 5.196       | 1.99 (0.14)               | 24.30                          | 1.12                          | 21.150                      | 16.710 - 26.770     |
| MH-AG     | 2019 | 2.422                       | 2.226 - 2.636       | 2.14 (0.17)               | 12.26                          | 0.57                          | 9.617                       | 7.516 - 12.300      |
| AP-KG     | 2019 | 2.450                       | 2.260 - 2.656       | 1.78 (0.12)               | 12.40                          | 0.57                          | 12.800                      | 9.980 - 16.410      |
| KA-BA     | 2019 | 4.240                       | 3.944 - 4.558       | 2.24 (0.16)               | 21.46                          | 0.99                          | 15.820                      | 12.830 - 19.500     |
| KA-HA     | 2019 | 1.985                       | 1.834 - 2.148       | 2.23 (0.18)               | 10.05                          | 0.46                          | 7.441                       | 5.878 - 9.421       |
| TN-TA     | 2019 | 6.404                       | 5.769 - 7.108       | 1.92 (0.18)               | 32.41                          | 1.50                          | 29.660                      | 21.350 - 41.210     |
| PB-HS     | 2020 | 4.055                       | 3.860 - 4.260       | 2.53 (0.14)               | 20.52                          | 0.95                          | 12.990                      | 11.300 - 14.940     |
| HR-KS     | 2020 | 9.070                       | 8.561 - 9.609       | 2.72 (0.19)               | 45.90                          | 2.12                          | 26.780                      | 22.630 - 31.690     |
| MP-CC     | 2020 | 7.022                       | 6.624 - 7.445       | 2.38 (0.15)               | 35.54                          | 1.64                          | 24.180                      | 20.420 - 28.620     |
| MP-CJ     | 2020 | 7.180                       | 6.779 - 7.604       | 2.03 (0.11)               | 36.34                          | 1.68                          | 30.700                      | 25.910 - 36.370     |
| MP-KB     | 2020 | 5.529                       | 5.175 - 5.908       | 2.04 (0.13)               | 27.98                          | 1.29                          | 23.380                      | 19.150 - 28.540     |
| MP-SK     | 2020 | 4.160                       | 3.959 - 4.370       | 2.19 (0.11)               | 21.05                          | 0.97                          | 15.940                      | 13.820 - 18.400     |
| MP-ST     | 2020 | 6.174                       | 5.825 - 6.544       | 2.18 (0.12)               | 31.24                          | 1.45                          | 23.910                      | 20.180 - 28.320     |
| MH-AK     | 2020 | 4.563                       | 4.388 - 4.745       | 2.90 (0.14)               | 23.09                          | 1.07                          | 12.570                      | 11.270 - 14.030     |
| MH-AP     | 2020 | 2.313                       | 2.203 - 2.428       | 2.26 (0.11)               | 11.71                          | 0.54                          | 8.537                       | 7.416 - 9.827       |
| AP-AD     | 2020 | 2.264                       | 2.118 - 2.420       | 1.86 (0.11)               | 11.46                          | 0.53                          | 10.990                      | 8.991 - 13.440      |
| AP-ET     | 2020 | 2.562                       | 2.354 - 2.790       | 1.93 (0.15)               | 12.97                          | 0.60                          | 11.780                      | 9.124 - 15.220      |
| AP-WV     | 2020 | 4.384                       | 4.173 - 4.605       | 1.75 (0.08)               | 22.19                          | 1.03                          | 23.590                      | 19.880 - 28.000     |
| AP-PB     | 2020 | 14.090                      | 13.250 - 14.990     | 2.34 (0.15)               | 71.31                          | 3.30                          | 49.580                      | 41.420 - 59.340     |
| KA-BI     | 2020 | 5.183                       | 4.833 - 5.557       | 2.19 (0.15)               | 26.23                          | 1.21                          | 19.880                      | 16.200 - 24.40      |
| KA-DG     | 2020 | 5.391                       | 5.089 - 5.712       | 2.30 (0.13)               | 27.28                          | 1.26                          | 19.380                      | 16.380 - 22.930     |
| KA-KV     | 2020 | 6.401                       | 6.170 - 6.641       | 2.53 (0.10)               | 32.39                          | 1.50                          | 20.510                      | 18.470 - 22.760     |
| KA-RH     | 2020 | 5.741                       | 5.391 - 6.113       | 2.32 (0.15)               | 29.05                          | 1.34                          | 20.460                      | 16.970 - 24.670     |
| TG-NV     | 2020 | 4.468                       | 4.194 - 4.760       | 2.00 (0.11)               | 22.61                          | 1.05                          | 19.450                      | 16.120 - 23.470     |
| TN-CA     | 2020 | 4.781                       | 4.460 - 5.125       | 2.01 (0.13)               | 24.20                          | 1.12                          | 20.630                      | 16.780 - 25.370     |
| TN-CM     | 2020 | 5.052                       | 4.599 - 5.549       | 1.80 (0.14)               | 25.57                          | 1.18                          | 25.880                      | 19.350 - 34.630     |
| TN-ES     | 2020 | 4.190                       | 4.002 - 4.387       | 2.23 (0.10)               | 21.20                          | 0.98                          | 15.710                      | 13.760 - 17.940     |
| TN-TT     | 2020 | 3.663                       | 3.510 - 3.824       | 2.41 (0.11)               | 18.54                          | 0.86                          | 12.460                      | 11.020 - 14.090     |
| TN-TV     | 2020 | 4.998                       | 4.679 - 5.339       | 2.01 (0.12)               | 25.29                          | 1.17                          | 21.640                      | 17.760 - 26.350     |

<sup>1</sup>CI: confidence interval; <sup>2</sup>SE: standard error; <sup>3</sup>RR: resistance ratio, EC<sub>50</sub> values of respective population divided by EC<sub>50</sub> of population SUS-2005 or I-2018

**Table S6.** Log-dose mortality data for spinetoram against third instar larvae of Indian populations of *Spodoptera frugiperda* in diet incorporation assays based on IRAC method no. 20. Mortality was assessed five days after treatment.

| Sample ID | Year | EC <sub>50</sub><br>[µg/mL] | 95% CI <sup>1</sup> | Slope (±SE <sup>2</sup> ) | RR <sup>3</sup> to<br>SUS-2005 | RR <sup>3</sup> to I-<br>2018 | EC <sub>95</sub><br>[µg/mL] | 95% CI <sup>1</sup> |
|-----------|------|-----------------------------|---------------------|---------------------------|--------------------------------|-------------------------------|-----------------------------|---------------------|
| SUS-2005  | 2005 | 0.010                       | 0.009 - 0.012       | 2.35 (0.37)               | 1.00                           | 0.78                          | 0.036                       | 0.024 - 0.055       |
| I-2018    | 2018 | 0.013                       | 0.012 - 0.014       | 2.25 (0.13)               | 1.28                           | 1.00                          | 0.049                       | 0.041 - 0.058       |
| MP-BB     | 2019 | 0.021                       | 0.020 - 0.023       | 3.29 (0.26)               | 2.07                           | 1.62                          | 0.052                       | 0.045 - 0.061       |
| MP-CC     | 2019 | 0.015                       | 0.014 - 0.016       | 2.46 (0.14)               | 1.45                           | 1.13                          | 0.049                       | 0.043 - 0.057       |
| MP-CCD    | 2019 | 0.029                       | 0.027 - 0.030       | 1.92 (0.08)               | 2.78                           | 2.17                          | 0.133                       | 0.113 - 0.155       |
| MP-IA     | 2019 | 0.023                       | 0.021 - 0.024       | 3.16 (0.24)               | 2.21                           | 1.73                          | 0.058                       | 0.049 - 0.067       |
| MP-ID     | 2019 | 0.016                       | 0.015 - 0.017       | 2.50 (0.14)               | 1.54                           | 1.21                          | 0.051                       | 0.044 - 0.060       |
| MP-SM     | 2019 | 0.022                       | 0.021 - 0.023       | 2.74 (0.18)               | 2.12                           | 1.66                          | 0.064                       | 0.054 - 0.075       |
| MH-AG     | 2019 | 0.018                       | 0.017 - 0.019       | 2.53 (0.14)               | 1.72                           | 1.34                          | 0.057                       | 0.049 - 0.065       |
| MH-AH     | 2019 | 0.019                       | 0.018 - 0.020       | 2.55 (0.14)               | 1.87                           | 1.46                          | 0.061                       | 0.053 - 0.071       |
| MH-AK     | 2019 | 0.014                       | 0.013 - 0.014       | 2.35 (0.12)               | 1.33                           | 1.04                          | 0.048                       | 0.041 - 0.055       |
| AP-KG     | 2019 | 0.015                       | 0.014 - 0.016       | 2.48 (0.14)               | 1.43                           | 1.12                          | 0.048                       | 0.041 - 0.056       |
| AP-PB     | 2019 | 0.013                       | 0.012 - 0.013       | 2.28 (0.12)               | 1.22                           | 0.95                          | 0.046                       | 0.039 - 0.053       |
| AP-WV     | 2019 | 0.011                       | 0.011 - 0.012       | 2.77 (0.13)               | 1.10                           | 0.86                          | 0.033                       | 0.029 - 0.037       |
| KA-BA     | 2019 | 0.011                       | 0.010 - 0.012       | 2.47 (0.24)               | 1.10                           | 0.86                          | 0.037                       | 0.029 - 0.048       |
| KA-BS     | 2019 | 0.009                       | 0.009 - 0.010       | 2.22 (0.14)               | 0.89                           | 0.70                          | 0.035                       | 0.029 - 0.041       |
| KA-BI     | 2019 | 0.013                       | 0.013 - 0.014       | 2.89 (0.16)               | 1.31                           | 1.03                          | 0.037                       | 0.033 - 0.042       |
| KA-BN     | 2019 | 0.021                       | 0.020 - 0.022       | 2.71 (0.14)               | 2.06                           | 1.61                          | 0.063                       | 0.055 - 0.071       |
| KA-HA     | 2019 | 0.021                       | 0.020 - 0.022       | 2.98 (0.19)               | 2.04                           | 1.60                          | 0.056                       | 0.049 - 0.065       |
| KA-RH     | 2019 | 0.013                       | 0.012 - 0.014       | 2.17 (0.21)               | 1.24                           | 0.97                          | 0.050                       | 0.037 - 0.066       |
| TN-AR     | 2019 | 0.020                       | 0.019 - 0.023       | 2.47 (0.26)               | 1.99                           | 1.55                          | 0.067                       | 0.051 - 0.090       |
| TN-AS1    | 2019 | 0.020                       | 0.019 - 0.021       | 2.92 (0.14)               | 1.92                           | 1.50                          | 0.054                       | 0.049 - 0.060       |
| TN-AS2    | 2019 | 0.013                       | 0.012 - 0.014       | 2.77 (0.15)               | 1.27                           | 0.99                          | 0.038                       | 0.033 - 0.043       |
| TN-CD     | 2019 | 0.025                       | 0.023 - 0.027       | 2.57 (0.23)               | 2.45                           | 1.92                          | 0.079                       | 0.063 - 0.100       |
| TN-TA     | 2019 | 0.013                       | 0.012 - 0.015       | 2.22 (0.23)               | 1.30                           | 1.02                          | 0.050                       | 0.037 - 0.069       |
| TN-TP     | 2019 | 0.009                       | 0.008 - 0.010       | 1.61 (0.12)               | 0.91                           | 0.71                          | 0.058                       | 0.043 - 0.079       |
| PB-HS     | 2020 | 0.017                       | 0.016 - 0.018       | 2.48 (0.13)               | 1.66                           | 1.30                          | 0.056                       | 0.049 - 0.064       |
| HR-KS     | 2020 | 0.020                       | 0.019 - 0.022       | 2.02 (0.12)               | 1.99                           | 1.56                          | 0.088                       | 0.073 - 0.107       |
| MP-CC     | 2020 | 0.017                       | 0.016 - 0.018       | 2.34 (0.15)               | 1.66                           | 1.30                          | 0.060                       | 0.050 - 0.072       |
| MP-CJ     | 2020 | 0.015                       | 0.014 - 0.016       | 2.40 (0.14)               | 1.48                           | 1.15                          | 0.052                       | 0.044 - 0.061       |
| MP-KB     | 2020 | 0.016                       | 0.016 - 0.017       | 2.22 (0.10)               | 1.60                           | 1.25                          | 0.062                       | 0.054 - 0.071       |
| MP-SK     | 2020 | 0.019                       | 0.018 - 0.020       | 2.47 (0.12)               | 1.86                           | 1.45                          | 0.063                       | 0.055 - 0.072       |
| MP-ST     | 2020 | 0.017                       | 0.017 - 0.018       | 2.46 (0.15)               | 1.70                           | 1.33                          | 0.058                       | 0.049 - 0.067       |
| MH-AK     | 2020 | 0.020                       | 0.019 - 0.021       | 2.57 (0.13)               | 1.97                           | 1.54                          | 0.064                       | 0.056 - 0.072       |
| MH-AP     | 2020 | 0.019                       | 0.018 - 0.020       | 2.37 (0.12)               | 1.82                           | 1.43                          | 0.065                       | 0.056 - 0.075       |
| AP-AD     | 2020 | 0.019                       | 0.018 - 0.020       | 2.47 (0.11)               | 1.83                           | 1.43                          | 0.062                       | 0.055 - 0.070       |
| AP-ET     | 2020 | 0.013                       | 0.012 - 0.014       | 2.23 (0.16)               | 1.29                           | 1.01                          | 0.050                       | 0.040 - 0.061       |
| AP-WV     | 2020 | 0.014                       | 0.013 - 0.014       | 2.67 (0.18)               | 1.33                           | 1.04                          | 0.041                       | 0.035 - 0.049       |
| AP-PB     | 2020 | 0.013                       | 0.013 - 0.014       | 2.82 (0.18)               | 1.28                           | 1.00                          | 0.037                       | 0.032 - 0.043       |
| KA-BI     | 2020 | 0.015                       | 0.014 - 0.017       | 2.03 (0.13)               | 1.50                           | 1.17                          | 0.066                       | 0.053 - 0.081       |
| KA-DG     | 2020 | 0.021                       | 0.020 - 0.022       | 2.50 (0.13)               | 2.06                           | 1.61                          | 0.069                       | 0.060 - 0.079       |
| KA-KV     | 2020 | 0.016                       | 0.015 - 0.017       | 2.33 (0.14)               | 1.52                           | 1.19                          | 0.055                       | 0.046 - 0.066       |
| KA-RH     | 2020 | 0.020                       | 0.019 - 0.022       | 2.03 (0.12)               | 1.99                           | 1.56                          | 0.087                       | 0.072 - 0.106       |
| TG-NV     | 2020 | 0.017                       | 0.016 - 0.018       | 2.00 (0.14)               | 1.63                           | 1.27                          | 0.073                       | 0.058 - 0.092       |
| TN-CA     | 2020 | 0.027                       | 0.025 - 0.028       | 2.57 (0.16)               | 2.61                           | 2.04                          | 0.085                       | 0.072 - 0.099       |
| TN-CM     | 2020 | 0.021                       | 0.020 - 0.021       | 2.68 (0.10)               | 2.02                           | 1.58                          | 0.062                       | 0.057 - 0.068       |
| TN-ES     | 2020 | 0.019                       | 0.018 - 0.020       | 2.58 (0.16)               | 1.85                           | 1.45                          | 0.060                       | 0.051 - 0.070       |
| TN-TT     | 2020 | 0.025                       | 0.023 - 0.027       | 2.36 (0.18)               | 2.42                           | 1.90                          | 0.087                       | 0.070 - 0.107       |
| TN-TV     | 2020 | 0.027                       | 0.026 - 0.028       | 2.61 (0.11)               | 2.61                           | 2.04                          | 0.083                       | 0.074 - 0.092       |



<sup>1</sup>CI: confidence interval; <sup>2</sup>SE: standard error; <sup>3</sup>RR: resistance ratio, EC<sub>50</sub> values of respective population divided by EC<sub>50</sub> of population SUS-2005 or I-2018

**Table S7.** Log-dose mortality data for emamectin benzoate against third instar larvae of Indian populations of *Spodoptera frugiperda* in diet incorporation assays based on IRAC method no. 20. Mortality was assessed five days after treatment.

| Sample ID | Year | EC <sub>50</sub><br>[µg/mL] | 95% CI <sup>1</sup> | Slope (±SE <sup>2</sup> ) | RR <sup>3</sup> to<br>SUS-2005 | RR <sup>3</sup> to I-<br>2018 | EC <sub>95</sub><br>[µg/mL] | 95% CI <sup>1</sup> |
|-----------|------|-----------------------------|---------------------|---------------------------|--------------------------------|-------------------------------|-----------------------------|---------------------|
| SUS-2005  | 2005 | 0.011                       | 0.010 - 0.011       | 7.63 (1.21)               | 1.00                           | 1.09                          | 0.016                       | 0.013 - 0.018       |
| I-2018    | 2018 | 0.010                       | 0.009 - 0.010       | 2.66 (0.14)               | 0.91                           | 1.00                          | 0.029                       | 0.026 - 0.033       |
| MP-BB     | 2019 | 0.012                       | 0.012 - 0.013       | 2.37 (0.12)               | 1.15                           | 1.25                          | 0.042                       | 0.037 - 0.048       |
| MP-CC     | 2019 | 0.012                       | 0.012 - 0.013       | 2.82 (0.17)               | 1.16                           | 1.27                          | 0.035                       | 0.031 - 0.040       |
| MP-CCD    | 2019 | 0.011                       | 0.011 - 0.012       | 2.43 (0.15)               | 1.06                           | 1.15                          | 0.038                       | 0.032 - 0.045       |
| MP-IA     | 2019 | 0.012                       | 0.012 - 0.013       | 2.27 (0.14)               | 1.16                           | 1.26                          | 0.045                       | 0.038 - 0.053       |
| MP-ID     | 2019 | 0.011                       | 0.011 - 0.012       | 2.30 (0.13)               | 1.06                           | 1.16                          | 0.040                       | 0.034 - 0.048       |
| MP-SM     | 2019 | 0.011                       | 0.010 - 0.011       | 2.44 (0.11)               | 1.00                           | 1.09                          | 0.036                       | 0.031 - 0.040       |
| MH-AG     | 2019 | 0.012                       | 0.011 - 0.012       | 2.50 (0.15)               | 1.09                           | 1.19                          | 0.038                       | 0.032 - 0.044       |
| MH-AH     | 2019 | 0.013                       | 0.012 - 0.014       | 2.33 (0.19)               | 1.20                           | 1.32                          | 0.045                       | 0.036 - 0.057       |
| MH-AK     | 2019 | 0.011                       | 0.010 - 0.012       | 2.51 (0.14)               | 1.03                           | 1.13                          | 0.035                       | 0.031 - 0.041       |
| AP-KG     | 2019 | 0.010                       | 0.009 - 0.010       | 2.61 (0.14)               | 0.91                           | 0.99                          | 0.030                       | 0.026 - 0.034       |
| AP-PB     | 2019 | 0.011                       | 0.011 - 0.011       | 2.38 (0.10)               | 1.04                           | 1.13                          | 0.038                       | 0.034 - 0.043       |
| AP-WV     | 2019 | 0.012                       | 0.012 - 0.013       | 2.64 (0.13)               | 1.15                           | 1.26                          | 0.037                       | 0.033 - 0.042       |
| KA-BA     | 2019 | 0.010                       | 0.010 - 0.011       | 2.71 (0.13)               | 0.95                           | 1.04                          | 0.030                       | 0.027 - 0.034       |
| KA-BS     | 2019 | 0.012                       | 0.011 - 0.013       | 2.62 (0.16)               | 1.13                           | 1.24                          | 0.037                       | 0.032 - 0.043       |
| KA-BI     | 2019 | 0.011                       | 0.010 - 0.011       | 2.71 (0.15)               | 0.99                           | 1.09                          | 0.031                       | 0.027 - 0.036       |
| KA-BN     | 2019 | 0.008                       | 0.008 - 0.008       | 2.30 (0.10)               | 0.76                           | 0.83                          | 0.029                       | 0.026 - 0.033       |
| KA-HA     | 2019 | 0.014                       | 0.013 - 0.015       | 2.13 (0.13)               | 1.34                           | 1.46                          | 0.056                       | 0.047 - 0.068       |
| KA-RH     | 2019 | 0.011                       | 0.011 - 0.012       | 2.40 (0.13)               | 1.07                           | 1.17                          | 0.039                       | 0.033 - 0.044       |
| TN-AR     | 2019 | 0.010                       | 0.010 - 0.011       | 2.20 (0.12)               | 0.97                           | 1.06                          | 0.039                       | 0.034 - 0.046       |
| TN-AS1    | 2019 | 0.011                       | 0.010 - 0.011       | 2.46 (0.09)               | 1.02                           | 1.11                          | 0.036                       | 0.032 - 0.039       |
| TN-AS2    | 2019 | 0.013                       | 0.012 - 0.014       | 2.42 (0.15)               | 1.22                           | 1.33                          | 0.044                       | 0.037 - 0.052       |
| TN-CD     | 2019 | 0.013                       | 0.013 - 0.014       | 2.18 (0.12)               | 1.26                           | 1.37                          | 0.051                       | 0.044 - 0.060       |
| TN-TA     | 2019 | 0.058                       | 0.053 - 0.063       | 2.17 (0.18)               | 5.46                           | 5.97                          | 0.225                       | 0.174 - 0.290       |
| TN-TP     | 2019 | 0.011                       | 0.011 - 0.012       | 1.92 (0.14)               | 1.08                           | 1.18                          | 0.053                       | 0.042 - 0.068       |
| PB-HS     | 2020 | 0.003                       | 0.003 - 0.003       | 2.12 (0.11)               | 0.27                           | 0.30                          | 0.012                       | 0.010 - 0.014       |
| HR-KS     | 2020 | 0.013                       | 0.013 - 0.014       | 2.59 (0.11)               | 1.23                           | 1.35                          | 0.041                       | 0.037 - 0.045       |
| MP-CC     | 2020 | 0.004                       | 0.004 - 0.005       | 1.75 (0.10)               | 0.42                           | 0.46                          | 0.024                       | 0.019 - 0.029       |
| MP-CJ     | 2020 | 0.006                       | 0.006 - 0.006       | 1.59 (0.08)               | 0.56                           | 0.61                          | 0.038                       | 0.031 - 0.046       |
| MP-KB     | 2020 | 0.004                       | 0.004 - 0.004       | 2.35 (0.11)               | 0.38                           | 0.41                          | 0.014                       | 0.012 - 0.016       |
| MP-SK     | 2020 | 0.005                       | 0.005 - 0.005       | 2.03 (0.10)               | 0.46                           | 0.51                          | 0.021                       | 0.018 - 0.025       |
| MP-ST     | 2020 | 0.004                       | 0.004 - 0.004       | 2.35 (0.13)               | 0.39                           | 0.43                          | 0.014                       | 0.012 - 0.017       |
| MH-AK     | 2020 | 0.017                       | 0.016 - 0.017       | 1.92 (0.09)               | 1.56                           | 1.71                          | 0.077                       | 0.066 - 0.090       |
| MH-AP     | 2020 | 0.022                       | 0.021 - 0.023       | 1.97 (0.10)               | 2.09                           | 2.29                          | 0.099                       | 0.083 - 0.117       |
| AP-AD     | 2020 | 0.006                       | 0.006 - 0.007       | 1.99 (0.14)               | 0.61                           | 0.67                          | 0.028                       | 0.023 - 0.036       |
| AP-ET     | 2020 | 0.005                       | 0.005 - 0.006       | 2.55 (0.23)               | 0.51                           | 0.56                          | 0.017                       | 0.014 - 0.022       |
| AP-WV     | 2020 | 0.004                       | 0.004 - 0.004       | 1.88 (0.12)               | 0.39                           | 0.43                          | 0.020                       | 0.016 - 0.025       |
| AP-PB     | 2020 | 0.006                       | 0.006 - 0.007       | 2.18 (0.15)               | 0.58                           | 0.63                          | 0.024                       | 0.019 - 0.029       |
| KA-BI     | 2020 | 0.009                       | 0.008 - 0.009       | 2.29 (0.12)               | 0.82                           | 0.89                          | 0.031                       | 0.027 - 0.037       |
| KA-DG     | 2020 | 0.006                       | 0.005 - 0.006       | 2.40 (0.13)               | 0.52                           | 0.57                          | 0.019                       | 0.016 - 0.022       |
| KA-KV     | 2020 | 0.006                       | 0.006 - 0.007       | 2.29 (0.13)               | 0.60                           | 0.66                          | 0.023                       | 0.020 - 0.027       |
| KA-RH     | 2020 | 0.007                       | 0.006 - 0.007       | 1.86 (0.14)               | 0.62                           | 0.67                          | 0.032                       | 0.024 - 0.041       |
| TG-NV     | 2020 | 0.012                       | 0.011 - 0.012       | 1.89 (0.11)               | 1.09                           | 1.20                          | 0.055                       | 0.045 - 0.068       |
| TN-CA     | 2020 | 0.006                       | 0.006 - 0.006       | 1.97 (0.13)               | 0.56                           | 0.62                          | 0.027                       | 0.021 - 0.033       |
| TN-CM     | 2020 | 0.014                       | 0.013 - 0.015       | 2.00 (0.11)               | 1.32                           | 1.44                          | 0.061                       | 0.051 - 0.073       |
| TN-ES     | 2020 | 0.005                       | 0.005 - 0.005       | 2.37 (0.11)               | 0.48                           | 0.52                          | 0.018                       | 0.015 - 0.020       |
| TN-TT     | 2020 | 0.008                       | 0.008 - 0.009       | 2.18 (0.12)               | 0.80                           | 0.88                          | 0.033                       | 0.028 - 0.039       |

|       |      |       |               |             |      |      |       |               |
|-------|------|-------|---------------|-------------|------|------|-------|---------------|
| TN-TV | 2020 | 0.012 | 0.011 - 0.013 | 2.58 (0.17) | 1.11 | 1.22 | 0.037 | 0.031 - 0.044 |
|-------|------|-------|---------------|-------------|------|------|-------|---------------|

<sup>1</sup>CI: confidence interval; <sup>2</sup>SE: standard error; <sup>3</sup>RR: resistance ratio, EC<sub>50</sub> values of respective population divided by EC<sub>50</sub> of population SUS-2005 or I-2018

**Table S8.** Log-dose mortality data for flubendiamide against third instar larvae of Indian populations of *Spodoptera frugiperda* in diet incorporation assays based on IRAC method no. 20. Mortality was assessed five days after treatment.

| Sample ID | Year | EC <sub>50</sub><br>[µg/mL] | 95% CI <sup>1</sup> | Slope (±SE <sup>2</sup> ) | RR <sup>3</sup> to<br>SUS-2005 | RR <sup>3</sup> to I-<br>2018 | EC <sub>95</sub><br>[µg/mL] | 95% CI <sup>1</sup> |
|-----------|------|-----------------------------|---------------------|---------------------------|--------------------------------|-------------------------------|-----------------------------|---------------------|
| SUS-2005  | 2005 | 0.034                       | 0.033 - 0.035       | 4.59 (0.26)               | 1.00                           | 0.30                          | 0.065                       | 0.060 - 0.071       |
| I-2018    | 2018 | 0.114                       | 0.109 - 0.120       | 2.30 (0.12)               | 3.33                           | 1.00                          | 0.412                       | 0.357 - 0.476       |
| MP-BB     | 2019 | 0.224                       | 0.214 - 0.234       | 2.29 (0.10)               | 6.51                           | 1.96                          | 0.811                       | 0.716 - 0.919       |
| MP-CC     | 2019 | 0.212                       | 0.205 - 0.220       | 2.59 (0.10)               | 6.17                           | 1.85                          | 0.661                       | 0.597 - 0.731       |
| MP-CCD    | 2019 | 0.238                       | 0.224 - 0.253       | 2.28 (0.14)               | 6.92                           | 2.08                          | 0.865                       | 0.727 - 1.029       |
| MP-IA     | 2019 | 0.748                       | 0.702 - 0.797       | 2.14 (0.13)               | 21.79                          | 6.55                          | 2.956                       | 2.458 - 3.555       |
| MP-ID     | 2019 | 0.520                       | 0.503 - 0.539       | 2.54 (0.10)               | 15.15                          | 4.55                          | 1.659                       | 1.502 - 1.831       |
| MP-SM     | 2019 | 0.249                       | 0.240 - 0.258       | 2.62 (0.11)               | 7.25                           | 2.18                          | 0.767                       | 0.693 - 0.849       |
| MH-AG     | 2019 | 0.146                       | 0.137 - 0.155       | 2.31 (0.15)               | 4.24                           | 1.27                          | 0.521                       | 0.436 - 0.622       |
| MH-AH     | 2019 | 0.102                       | 0.099 - 0.105       | 3.01 (0.13)               | 2.98                           | 0.89                          | 0.272                       | 0.248 - 0.298       |
| MH-AK     | 2019 | 0.113                       | 0.108 - 0.118       | 2.40 (0.11)               | 3.30                           | 0.99                          | 0.387                       | 0.341 - 0.439       |
| AP-KG     | 2019 | 0.223                       | 0.216 - 0.231       | 2.54 (0.10)               | 6.50                           | 1.95                          | 0.711                       | 0.643 - 0.785       |
| AP-PB     | 2019 | 0.264                       | 0.252 - 0.278       | 2.34 (0.12)               | 7.70                           | 2.31                          | 0.930                       | 0.807 - 1.071       |
| AP-WV     | 2019 | 0.241                       | 0.230 - 0.254       | 2.48 (0.13)               | 7.03                           | 2.11                          | 0.792                       | 0.690 - 0.909       |
| KA-BA     | 2019 | 0.294                       | 0.279 - 0.310       | 3.04 (0.21)               | 8.56                           | 2.57                          | 0.775                       | 0.667 - 0.901       |
| KA-BS     | 2019 | 0.298                       | 0.286 - 0.311       | 2.94 (0.16)               | 8.68                           | 2.61                          | 0.812                       | 0.722 - 0.914       |
| KA-BI     | 2019 | 0.568                       | 0.533 - 0.606       | 2.68 (0.20)               | 16.55                          | 4.97                          | 1.706                       | 1.423 - 2.047       |
| KA-BN     | 2019 | 0.511                       | 0.482 - 0.542       | 2.06 (0.11)               | 14.87                          | 4.47                          | 2.127                       | 1.791 - 2.525       |
| KA-HA     | 2019 | 0.841                       | 0.792 - 0.894       | 2.31 (0.14)               | 24.50                          | 7.36                          | 3.007                       | 2.525 - 3.581       |
| KA-RH     | 2019 | 0.276                       | 0.252 - 0.301       | 1.82 (0.14)               | 8.03                           | 2.41                          | 1.391                       | 1.062 - 1.823       |
| TN-AR     | 2019 | 0.101                       | 0.093 - 0.110       | 1.89 (0.15)               | 2.95                           | 0.89                          | 0.480                       | 0.370 - 0.622       |
| TN-AS1    | 2019 | 0.451                       | 0.428 - 0.475       | 2.32 (0.12)               | 13.13                          | 3.95                          | 1.602                       | 1.379 - 1.860       |
| TN-AS2    | 2019 | 0.436                       | 0.407 - 0.467       | 2.20 (0.15)               | 12.69                          | 3.81                          | 1.658                       | 1.359 - 2.023       |
| TN-CD     | 2019 | 0.310                       | 0.290 - 0.332       | 2.22 (0.15)               | 9.03                           | 2.71                          | 1.169                       | 0.959 - 1.424       |
| TN-TA     | 2019 | 0.273                       | 0.252 - 0.296       | 1.95 (0.14)               | 7.95                           | 2.39                          | 1.239                       | 0.974 - 1.577       |
| TN-TP     | 2019 | 0.375                       | 0.359 - 0.392       | 2.44 (0.12)               | 10.91                          | 3.28                          | 1.252                       | 1.102 - 1.423       |
| PB-HS     | 2020 | 0.633                       | 0.590 - 0.678       | 2.07 (0.15)               | 18.42                          | 5.53                          | 2.616                       | 2.005 - 3.412       |
| HR-KS     | 2020 | 0.442                       | 0.409 - 0.478       | 2.34 (0.19)               | 12.87                          | 3.87                          | 1.556                       | 1.235 - 1.961       |
| MP-CC     | 2020 | 0.308                       | 0.287 - 0.330       | 1.94 (0.12)               | 8.96                           | 2.69                          | 1.401                       | 1.137 - 1.726       |
| MP-CJ     | 2020 | 0.308                       | 0.287 - 0.330       | 1.94 (0.12)               | 8.96                           | 2.69                          | 1.401                       | 1.137 - 1.726       |
| MP-KB     | 2020 | 0.241                       | 0.229 - 0.254       | 2.33 (0.12)               | 7.02                           | 2.11                          | 0.856                       | 0.738 - 0.992       |
| MP-SK     | 2020 | 0.354                       | 0.336 - 0.372       | 2.57 (0.15)               | 10.29                          | 3.09                          | 1.110                       | 0.958 - 1.286       |
| MP-ST     | 2020 | 0.390                       | 0.369 - 0.414       | 2.03 (0.11)               | 11.37                          | 3.42                          | 1.664                       | 1.395 - 1.985       |
| MH-AK     | 2020 | 0.122                       | 0.116 - 0.129       | 1.95 (0.10)               | 3.56                           | 1.07                          | 0.552                       | 0.467 - 0.654       |
| MH-AP     | 2020 | 0.076                       | 0.070 - 0.082       | 1.60 (0.10)               | 2.20                           | 0.66                          | 0.477                       | 0.367 - 0.620       |
| AP-AD     | 2020 | 0.275                       | 0.254 - 0.298       | 2.03 (0.15)               | 8.02                           | 2.41                          | 1.171                       | 0.929 - 1.478       |
| AP-ET     | 2020 | 0.056                       | 0.052 - 0.061       | 2.22 (0.17)               | 1.63                           | 0.49                          | 0.212                       | 0.168 - 0.266       |
| AP-WV     | 2020 | 0.040                       | 0.037 - 0.043       | 2.24 (0.18)               | 1.17                           | 0.35                          | 0.150                       | 0.118 - 0.189       |
| AP-PB     | 2020 | 0.108                       | 0.101 - 0.117       | 2.21 (0.16)               | 3.15                           | 0.95                          | 0.410                       | 0.329 - 0.512       |
| KA-BI     | 2020 | 0.623                       | 0.585 - 0.663       | 2.03 (0.12)               | 18.14                          | 5.45                          | 2.651                       | 2.204 - 3.188       |
| KA-DG     | 2020 | 0.287                       | 0.270 - 0.305       | 2.17 (0.13)               | 8.35                           | 2.51                          | 1.112                       | 0.929 - 1.330       |
| KA-KV     | 2020 | 0.373                       | 0.354 - 0.393       | 2.52 (0.15)               | 10.86                          | 3.26                          | 1.201                       | 1.032 - 1.398       |
| KA-RH     | 2020 | 0.222                       | 0.211 - 0.234       | 2.12 (0.11)               | 6.47                           | 1.94                          | 0.892                       | 0.763 - 1.041       |
| TG-NV     | 2020 | 0.776                       | 0.715 - 0.843       | 1.85 (0.13)               | 22.61                          | 6.79                          | 3.799                       | 2.959 - 4.878       |
| TN-CA     | 2020 | 0.195                       | 0.183 - 0.208       | 2.35 (0.16)               | 5.68                           | 1.71                          | 0.683                       | 0.566 - 0.825       |
| TN-CM     | 2020 | 0.151                       | 0.140 - 0.163       | 1.84 (0.12)               | 4.39                           | 1.32                          | 0.746                       | 0.593 - 0.939       |
| TN-ES     | 2020 | 0.134                       | 0.128 - 0.140       | 2.56 (0.13)               | 3.90                           | 1.17                          | 0.423                       | 0.372 - 0.481       |

|       |      |       |               |             |       |      |       |               |
|-------|------|-------|---------------|-------------|-------|------|-------|---------------|
| TN-TT | 2020 | 0.561 | 0.525 - 0.598 | 1.93 (0.11) | 16.32 | 4.90 | 2.578 | 2.124 - 3.129 |
| TN-TV | 2020 | 0.723 | 0.665 - 0.787 | 2.12 (0.17) | 21.06 | 6.33 | 2.899 | 2.257 - 3.724 |

<sup>1</sup>CI: confidence interval; <sup>2</sup>SE: standard error; <sup>3</sup>RR: resistance ratio, EC<sub>50</sub> values of respective population divided by EC<sub>50</sub> of population SUS-2005 or I-2018

**Table S9.** Log-dose mortality data for chlorantraniliprole against third instar larvae of Indian populations of *Spodoptera frugiperda* in diet incorporation assays based on IRAC method no. 20. Mortality was assessed five days after treatment.

| Sample ID | Year | EC <sub>50</sub><br>[µg/mL] | 95% CI <sup>1</sup> | Slope (±SE <sup>2</sup> ) | RR <sup>3</sup> to<br>SUS-2005 | RR <sup>3</sup> to I-<br>2018 | EC <sub>95</sub><br>[µg/mL] | 95% CI <sup>1</sup> |
|-----------|------|-----------------------------|---------------------|---------------------------|--------------------------------|-------------------------------|-----------------------------|---------------------|
| SUS-2005  | 2005 | 0.005                       | 0.005 – 0.006       | 4.54 (0.76)               | 1.00                           | 0.60                          | 0.010                       | 0.008 - 0.012       |
| I-2018    | 2018 | 0.009                       | 0.008 – 0.009       | 2.39 (0.11)               | 1.68                           | 1.00                          | 0.029                       | 0.026 - 0.033       |
| PB-HS     | 2020 | 0.016                       | 0.015 - 0.017       | 1.63 (0.08)               | 3.18                           | 1.90                          | 0.098                       | 0.080 - 0.120       |
| HR-KS     | 2020 | 0.035                       | 0.033 - 0.037       | 2.12 (0.11)               | 6.84                           | 4.08                          | 0.139                       | 0.118 - 0.164       |
| MP-CC     | 2020 | 0.012                       | 0.011 - 0.013       | 2.04 (0.11)               | 2.40                           | 1.43                          | 0.052                       | 0.043 - 0.062       |
| MP-CJ     | 2020 | 0.028                       | 0.026 - 0.031       | 1.38 (0.07)               | 5.53                           | 3.30                          | 0.236                       | 0.184 - 0.304       |
| MP-KB     | 2020 | 0.026                       | 0.025 - 0.028       | 2.12 (0.12)               | 5.18                           | 3.09                          | 0.106                       | 0.089 - 0.125       |
| MP-SK     | 2020 | 0.012                       | 0.012 - 0.013       | 2.36 (0.14)               | 2.44                           | 1.46                          | 0.043                       | 0.036 - 0.051       |
| MP-ST     | 2020 | 0.010                       | 0.009 - 0.011       | 1.31 (0.08)               | 2.01                           | 1.20                          | 0.096                       | 0.071 - 0.132       |
| MH-AK     | 2020 | 0.018                       | 0.017 - 0.018       | 2.29 (0.10)               | 3.47                           | 2.07                          | 0.064                       | 0.057 - 0.072       |
| MH-AP     | 2020 | 0.017                       | 0.016 - 0.018       | 2.37 (0.10)               | 3.34                           | 2.00                          | 0.059                       | 0.052 - 0.066       |
| AP-AD     | 2020 | 0.007                       | 0.007 - 0.007       | 1.82 (0.08)               | 1.37                           | 0.82                          | 0.035                       | 0.030 - 0.042       |
| AP-ET     | 2020 | 0.020                       | 0.020 - 0.021       | 2.46 (0.12)               | 4.03                           | 2.40                          | 0.068                       | 0.059 - 0.077       |
| AP-WV     | 2020 | 0.005                       | 0.005 - 0.005       | 1.69 (0.11)               | 0.96                           | 0.57                          | 0.028                       | 0.022 - 0.036       |
| AP-PB     | 2020 | 0.020                       | 0.019 - 0.021       | 2.14 (0.12)               | 3.93                           | 2.35                          | 0.079                       | 0.066 - 0.094       |
| KA-BI     | 2020 | 0.024                       | 0.022 - 0.025       | 2.14 (0.14)               | 4.66                           | 2.78                          | 0.094                       | 0.076 - 0.115       |
| KA-DG     | 2020 | 0.024                       | 0.022 - 0.026       | 2.09 (0.14)               | 4.70                           | 2.81                          | 0.097                       | 0.079 - 0.121       |
| KA-KV     | 2020 | 0.013                       | 0.012 - 0.013       | 2.55 (0.14)               | 2.50                           | 1.49                          | 0.040                       | 0.035 - 0.046       |
| KA-RH     | 2020 | 0.010                       | 0.009 - 0.011       | 1.74 (0.12)               | 1.95                           | 1.16                          | 0.054                       | 0.042 - 0.070       |
| TG-NV     | 2020 | 0.023                       | 0.021 - 0.025       | 1.98 (0.14)               | 4.49                           | 2.68                          | 0.101                       | 0.080 - 0.127       |
| TN-CA     | 2020 | 0.017                       | 0.017 - 0.018       | 2.14 (0.09)               | 3.43                           | 2.05                          | 0.069                       | 0.060 - 0.079       |
| TN-CM     | 2020 | 0.020                       | 0.019 - 0.022       | 1.90 (0.12)               | 3.95                           | 2.36                          | 0.095                       | 0.076 - 0.118       |
| TN-ES     | 2020 | 0.018                       | 0.017 - 0.019       | 2.23 (0.11)               | 3.48                           | 2.08                          | 0.066                       | 0.057 - 0.077       |
| TN-TT     | 2020 | 0.005                       | 0.005 - 0.006       | 2.30 (0.14)               | 1.03                           | 0.61                          | 0.019                       | 0.016 - 0.022       |
| TN-TV     | 2020 | 0.005                       | 0.004 - 0.005       | 2.08 (0.12)               | 0.91                           | 0.54                          | 0.019                       | 0.016 - 0.023       |

<sup>1</sup>CI: confidence interval; <sup>2</sup>SE: standard error; <sup>3</sup>RR: resistance ratio, EC<sub>50</sub> values of respective population divided by EC<sub>50</sub> of population SUS-2005 or I-2018

**Table S10.** Log-dose mortality data for tetraniliprole against third instar larvae of Indian populations of *Spodoptera frugiperda* in diet incorporation assays based on IRAC method no. 20. Mortality was assessed five days after treatment.

| Sample ID | Year | EC <sub>50</sub><br>[µg/mL] | 95% CI <sup>1</sup> | Slope (±SE) <sup>2</sup> | RR <sup>3</sup> to<br>SUS-2005 | RR <sup>3</sup> to<br>I-2018 | EC <sub>95</sub><br>[µg/mL] | 95% CI <sup>1</sup> |
|-----------|------|-----------------------------|---------------------|--------------------------|--------------------------------|------------------------------|-----------------------------|---------------------|
| SUS-2005  | 2005 | 0.016                       | 0.015 - 0.016       | 4.42 (0.25)              | 1.00                           | 0.79                         | 0.030                       | 0.028 - 0.033       |
| I-2018    | 2018 | 0.020                       | 0.019 - 0.021       | 2.54 (0.15)              | 1.27                           | 1.00                         | 0.063                       | 0.054 - 0.073       |
| MP-BB     | 2019 | 0.018                       | 0.017 - 0.018       | 2.61 (0.12)              | 1.14                           | 0.90                         | 0.055                       | 0.049 - 0.061       |
| MP-CC     | 2019 | 0.016                       | 0.015 - 0.017       | 2.42 (0.16)              | 1.03                           | 0.81                         | 0.054                       | 0.045 - 0.065       |
| MP-CCD    | 2019 | 0.013                       | 0.012 - 0.014       | 2.63 (0.19)              | 0.83                           | 0.65                         | 0.039                       | 0.033 - 0.047       |
| MP-IA     | 2019 | 0.013                       | 0.012 - 0.014       | 2.14 (0.11)              | 0.84                           | 0.66                         | 0.052                       | 0.044 - 0.060       |
| MP-ID     | 2019 | 0.013                       | 0.012 - 0.014       | 2.10 (0.13)              | 0.82                           | 0.64                         | 0.052                       | 0.043 - 0.063       |
| MP-SM     | 2019 | 0.011                       | 0.011 - 0.012       | 2.34 (0.11)              | 0.73                           | 0.58                         | 0.040                       | 0.035 - 0.046       |
| MH-AG     | 2019 | 0.016                       | 0.015 - 0.017       | 2.27 (0.14)              | 1.02                           | 0.80                         | 0.058                       | 0.049 - 0.069       |
| MH-AH     | 2019 | 0.015                       | 0.014 - 0.016       | 2.51 (0.15)              | 0.96                           | 0.76                         | 0.048                       | 0.041 - 0.056       |
| MH-AK     | 2019 | 0.012                       | 0.012 - 0.013       | 2.29 (0.10)              | 0.78                           | 0.61                         | 0.044                       | 0.038 - 0.050       |
| AP-KG     | 2019 | 0.013                       | 0.013 - 0.014       | 2.60 (0.13)              | 0.86                           | 0.68                         | 0.042                       | 0.037 - 0.047       |
| AP-PB     | 2019 | 0.017                       | 0.016 - 0.018       | 2.16 (0.14)              | 1.07                           | 0.84                         | 0.065                       | 0.054 - 0.079       |
| AP-WV     | 2019 | 0.021                       | 0.020 - 0.022       | 2.30 (0.12)              | 1.36                           | 1.07                         | 0.076                       | 0.065 - 0.088       |
| KA-BA     | 2019 | 0.015                       | 0.014 - 0.015       | 2.27 (0.11)              | 0.93                           | 0.73                         | 0.053                       | 0.046 - 0.061       |
| KA-BS     | 2019 | 0.019                       | 0.018 - 0.020       | 2.95 (0.18)              | 1.24                           | 0.98                         | 0.052                       | 0.046 - 0.060       |
| KA-BI     | 2019 | 0.018                       | 0.017 - 0.019       | 2.59 (0.15)              | 1.14                           | 0.90                         | 0.055                       | 0.047 - 0.064       |
| KA-BN     | 2019 | 0.023                       | 0.022 - 0.024       | 2.22 (0.13)              | 1.47                           | 1.15                         | 0.086                       | 0.073 - 0.101       |
| KA-HA     | 2019 | 0.014                       | 0.013 - 0.014       | 2.26 (0.09)              | 0.89                           | 0.70                         | 0.051                       | 0.045 - 0.058       |
| KA-RH     | 2019 | 0.022                       | 0.021 - 0.024       | 2.42 (0.16)              | 1.43                           | 1.13                         | 0.075                       | 0.063 - 0.090       |
| TN-AR     | 2019 | 0.020                       | 0.019 - 0.022       | 2.37 (0.15)              | 1.31                           | 1.03                         | 0.071                       | 0.060 - 0.084       |
| TN-AS1    | 2019 | 0.017                       | 0.015 - 0.018       | 2.18 (0.15)              | 1.06                           | 0.84                         | 0.064                       | 0.052 - 0.078       |
| TN-AS2    | 2019 | 0.020                       | 0.019 - 0.022       | 2.20 (0.14)              | 1.30                           | 1.03                         | 0.077                       | 0.064 - 0.093       |
| TN-CD     | 2019 | 0.024                       | 0.023 - 0.025       | 2.82 (0.16)              | 1.52                           | 1.20                         | 0.067                       | 0.059 - 0.077       |
| TN-TA     | 2019 | 0.021                       | 0.020 - 0.022       | 2.39 (0.12)              | 1.37                           | 1.08                         | 0.073                       | 0.064 - 0.084       |
| TN-TP     | 2019 | 0.018                       | 0.016 - 0.019       | 2.36 (0.22)              | 1.13                           | 0.89                         | 0.061                       | 0.047 - 0.078       |
| PB-HS     | 2020 | 0.008                       | 0.007 - 8424        | 2.15 (0.13)              | 0.51                           | 0.40                         | 0.031                       | 0.026 - 0.037       |
| HR-KS     | 2020 | 0.034                       | 0.033 - 0.036       | 2.52 (0.15)              | 2.21                           | 1.74                         | 0.110                       | 0.095 - 0.129       |
| MP-CC     | 2020 | 0.019                       | 0.018 - 0.021       | 2.14 (0.14)              | 1.25                           | 0.98                         | 0.077                       | 0.062 - 0.094       |
| MP-CJ     | 2020 | 0.015                       | 0.015 - 0.016       | 2.55 (0.10)              | 0.97                           | 0.77                         | 0.048                       | 0.043 - 0.053       |
| MP-KB     | 2020 | 0.022                       | 0.021 - 0.023       | 1.95 (0.08)              | 1.41                           | 1.11                         | 0.099                       | 0.086 - 0.115       |
| MP-SK     | 2020 | 0.023                       | 0.021 - 0.025       | 1.92 (0.12)              | 1.48                           | 1.17                         | 0.107                       | 0.085 - 0.133       |
| MP-ST     | 2020 | 0.021                       | 0.020 - 0.021       | 2.35 (0.09)              | 1.32                           | 1.04                         | 0.072                       | 0.064 - 0.081       |
| MH-AK     | 2020 | 0.015                       | 0.015 - 0.016       | 1.96 (0.09)              | 0.99                           | 0.78                         | 0.069                       | 0.060 - 0.080       |
| MH-AP     | 2020 | 0.013                       | 0.012 - 0.014       | 1.35 (0.08)              | 0.84                           | 0.66                         | 0.114                       | 0.088 - 0.149       |
| AP-AD     | 2020 | 0.028                       | 0.027 - 0.030       | 2.69 (0.14)              | 1.83                           | 1.44                         | 0.085                       | 0.075 - 0.096       |
| AP-ET     | 2020 | 0.017                       | 0.015 - 0.018       | 2.52 (0.22)              | 1.08                           | 0.85                         | 0.054                       | 0.043 - 0.067       |
| AP-WV     | 2020 | 0.013                       | 0.012 - 0.013       | 2.23 (0.13)              | 0.80                           | 0.63                         | 0.047                       | 0.040 - 0.055       |
| AP-PB     | 2020 | 0.019                       | 0.019 - 0.020       | 2.76 (0.14)              | 1.25                           | 0.99                         | 0.057                       | 0.050 - 0.064       |
| KA-BI     | 2020 | 0.025                       | 0.024 - 0.027       | 2.24 (0.12)              | 1.64                           | 1.29                         | 0.095                       | 0.081 - 0.110       |
| KA-DG     | 2020 | 0.018                       | 0.017 - 0.019       | 2.39 (0.16)              | 1.14                           | 0.90                         | 0.061                       | 0.050 - 0.074       |
| KA-KV     | 2020 | 0.019                       | 0.019 - 0.020       | 2.56 (0.14)              | 1.25                           | 0.99                         | 0.062                       | 0.054 - 0.071       |
| KA-RH     | 2020 | 0.023                       | 0.021 - 0.025       | 2.11 (0.17)              | 1.49                           | 1.17                         | 0.093                       | 0.073 - 0.120       |
| TG-NV     | 2020 | 0.029                       | 0.027 - 0.032       | 1.84 (0.13)              | 1.87                           | 1.47                         | 0.144                       | 0.112 - 0.186       |
| TN-CA     | 2020 | 0.034                       | 0.031 - 0.036       | 2.27 (0.18)              | 2.17                           | 1.71                         | 0.123                       | 0.098 - 0.156       |

|       |      |       |               |             |      |      |       |               |
|-------|------|-------|---------------|-------------|------|------|-------|---------------|
| TN-CM | 2020 | 0.018 | 0.018 - 0.019 | 2.60 (0.13) | 1.19 | 0.93 | 0.057 | 0.050 - 0.065 |
| TN-ES | 2020 | 0.036 | 0.034 - 0.038 | 1.88 (0.09) | 2.30 | 1.81 | 0.171 | 0.144 - 0.203 |
| TN-TT | 2020 | 0.022 | 0.021 - 0.023 | 2.13 (0.12) | 1.41 | 1.11 | 0.087 | 0.074 - 0.103 |
| TN-TV | 2020 | 0.022 | 0.020 - 0.023 | 1.95 (0.13) | 1.40 | 1.10 | 0.098 | 0.079 - 0.123 |

<sup>1</sup>CI: confidence interval; <sup>2</sup>SE: standard error; <sup>3</sup>RR: resistance ratio, EC<sub>50</sub> values of respective population divided by EC<sub>50</sub> of population SUS-2005 or I-2018

**Table S11.** Composite of EC<sub>50</sub> / EC<sub>95</sub> values of *Spodoptera frugiperda* populations treated with chlorpyrifos, deltamethrin and flubendiamide insecticides comparing collection years.

| Compound      | Year     | No. Populations | EC <sub>50</sub><br>[µg/mL] | 95% CI        | Slope (± SE) | EC <sub>95</sub><br>[µg/mL] | 95% CI          |
|---------------|----------|-----------------|-----------------------------|---------------|--------------|-----------------------------|-----------------|
| Chlorpyrifos  | SUS-2005 | 1               | 1.783                       | 1.693 - 1.879 | 6.72 (0.95)  | 2.763                       | 2.419 - 3.157   |
|               | I-2018   | 1               | 7.509                       | 7.119 - 7.921 | 2.31 (0.12)  | 26.870                      | 23.040 - 31.330 |
|               | 2019     | 7               | 5.562                       | 5.297 - 5.841 | 2.09 (0.10)  | 22.780                      | 19.710 - 26.340 |
|               | 2020     | 23              | 6.960                       | 6.575 - 7.358 | 1.50 (0.07)  | 49.590                      | 40.980 - 60.010 |
| Deltamethrin  | SUS-2005 | 1               | 0.198                       | 0.190 - 0.206 | 2.94 (0.16)  | 0.538                       | 0.481 - 0.602   |
|               | I-2018   | 1               | 4.271                       | 3.946 - 4.623 | 2.12 (0.16)  | 17.080                      | 13.420 - 21.750 |
|               | 2019     | 7               | 3.347                       | 3.101 - 3.612 | 1.74 (0.12)  | 18.160                      | 14.210 - 23.210 |
|               | 2020     | 23              | 4.931                       | 4.734 - 5.136 | 1.84 (0.07)  | 24.500                      | 21.580 - 27.830 |
| Flubendiamide | SUS-2005 | 1               | 0.034                       | 0.033 - 0.035 | 4.59 (0.26)  | 0.065                       | 0.060 - 0.071   |
|               | I-2018   | 1               | 0.114                       | 0.109 - 0.120 | 2.30 (0.12)  | 0.412                       | 0.357 - 0.476   |
|               | 2019     | 24              | 0.277                       | 0.261 - 0.294 | 1.59 (0.08)  | 1.772                       | 1.467 - 2.142   |
|               | 2020     | 23              | 0.272                       | 0.247 - 0.299 | 1.06 (0.07)  | 4.395                       | 3.064 - 6.305   |

<sup>1</sup>CI: confidence interval; <sup>2</sup>SE: standard error
